# Supplementary material for: Application of classification models to identify solvents for single-walled carbon nanotubes dispersion
Source: Royal Society of Chemistry journal article supplement (doi:10.1039/c5ra01261a), 2015-01-01
Supplement: c5ra01261a1.pdf [file c5ra01261a1.pdf]

## Supporting Information

### Application of Classification Models to Identify Solvents for Single-Walled Carbon Nanotubes Dispersion

M. Salahinejad

corresponding author: [salahinejad@gmail.com](mailto:salahinejad@gmail.com)

**Keywords:** Classification, Single-walled carbon nanotube (SWNT), Organic solvent, Dispersibility

**Table S1.** Names, SMILES of organic solvents dataset exploited for developing and validating the classification models.

| No. | Chemical Name                             | SMILES                                 | Class      |
|-----|-------------------------------------------|----------------------------------------|------------|
| 1   | N-Cyclohexyl-pyrrolidinone                | <chem>C1CCC(CC1)N2CCCC2=O</chem>       | solvent    |
| 2   | 1,3-Dimethyltetrahydro-2(1H)-pyrimidinone | <chem>O=C1N(C)CCCN1C</chem>            | solvent    |
| 3   | 1-Butylpyrrolidin-2-one                   | <chem>CCCCN1CCCC1=O</chem>             | solvent    |
| 4   | 1-Benzylpyrrolidin-2-one                  | <chem>C1CC(=O)N(C1)CC2=CC=CC=C2</chem> | solvent    |
| 5   | 1-Methylpyrrolidin-2-one (NMP)            | <chem>CN1CCCC1=O</chem>                | solvent    |
| 6   | 3-(2-Oxo-1-pyrrolidinyl) propanenitrile   | <chem>O=C1CCCN1CCC#N</chem>            | solvent    |
| 7   | N-Ethyl-pyrrolidinone                     | <chem>CCN1CCCC1=O</chem>               | solvent    |
| 8   | N-Octyl-pyrrolidone                       | <chem>CCCCCCCCN1CCCC1=O</chem>         | solvent    |
| 9   | N-Vinyl-pyrrolidinone                     | <chem>N1(C(CCC1)=O)C=C</chem>          | solvent    |
| 10  | Dimethyl-imidazolidinone                  | <chem>CN1CCN(C1=O)C</chem>             | solvent    |
| 11  | Dimethylacetamide                         | <chem>O=C(C)N(C)C</chem>               | solvent    |
| 12  | N-Formyl-piperidine                       | <chem>O=CN1CCCCC1</chem>               | solvent    |
| 13  | N-Dodecyl-pyrrolidone                     | <chem>CCCCCCCCCCCCN1CCCC1=O</chem>     | solvent    |
| 14  | Dimethylformamide                         | <chem>O=CN(C)C</chem>                  | solvent    |
| 15  | Benzyl acetate                            | <chem>CC(=O)OCc1ccccc1</chem>          | solvent    |
| 16  | Propionitrile                             | <chem>CCC#N</chem>                     | solvent    |
| 17  | Acrylic acid                              | <chem>C=CC(=O)O</chem>                 | solvent    |
| 18  | 2,2'-thiodiethanol                        | <chem>OCCSCCO</chem>                   | solvent    |
| 19  | Ethanol amine                             | <chem>NCCO</chem>                      | solvent    |
| 20  | Cyclopentanone                            | <chem>C1CCC(=O)C1</chem>               | solvent    |
| 21  | Chlorophenol                              | <chem>Oc1ccccc1Cl</chem>               | solvent    |
| 22  | Acetone                                   | <chem>CC(=O)C</chem>                   | solvent    |
| 23  | Benzyl benzoate                           | <chem>O=C(OCc1ccccc1)c2ccccc2</chem>   | solvent    |
| 24  | Isopropyl alcohol                         | <chem>CC(C)O</chem>                    | solvent    |
| 25  | Cyclohexanone                             | <chem>C1CCC(=O)CC1</chem>              | solvent    |
| 26  | Toluene                                   | <chem>Cc1ccccc1</chem>                 | solvent    |
| 27  | Triethyleneglycol                         | <chem>OCCOCCOCCO</chem>                | solvent    |
| 28  | Formamide                                 | <chem>O=CN</chem>                      | solvent    |
| 29  | Benzyl alcohol                            | <chem>OCC1=CC=CC=C1</chem>             | solvent    |
| 30  | Nitropropane                              | <chem>O=[N+]([O-])CCC</chem>           | nonsolvent |
| 31  | Ethylene glycol                           | <chem>OCCO</chem>                      | nonsolvent |
| 32  | Tetraethylene glycol                      | <chem>O(CCOCOC)CCOCOC</chem>           | nonsolvent |
| 33  | Triethylenephosphate                      | <chem>P(OCC)(OCC)(OCC)=O</chem>        | nonsolvent |
| 34  | Diethylenetriamine                        | <chem>N(CCN)CCN</chem>                 | nonsolvent |
| 35  | Tetrahydrofuran(THF)                      | <chem>O1CCCC1</chem>                   | nonsolvent |
| 36  | 2-Methoxy-1,3-Dioxolane                   | <chem>O1CCOC1OC</chem>                 | nonsolvent |
| 37  | 2-Pyrrolidone                             | <chem>O=C1NCCC1</chem>                 | nonsolvent |
| 38  | Acrylonitrile                             | <chem>N#CC=C</chem>                    | nonsolvent |
| 39  | Dichloroacetonitrile                      | <chem>ClC(Cl)C#N</chem>                | nonsolvent |

|     |                                        |                                    |            |
|-----|----------------------------------------|------------------------------------|------------|
| 40  | Pulegone                               | <chem>O=C1CC(CCC1=C(C)C)C</chem>   | nonsolvent |
| 41  | Dibenzyl ether                         | <chem>O(Cc1ccccc1)Cc1ccccc1</chem> | nonsolvent |
| 42  | Dioxane                                | <chem>O1CCOCC1</chem>              | nonsolvent |
| 43  | Benzophenone                           | <chem>O=C(c1ccccc1)c1ccccc1</chem> | nonsolvent |
| 44  | Dioxolane                              | <chem>O1CCOC1</chem>               | nonsolvent |
| 45  | Benzaldehyde                           | <chem>O=Cc1ccccc1</chem>           | nonsolvent |
| 46  | Morpholine                             | <chem>O1CCNCC1</chem>              | nonsolvent |
| 47  | Diethyleneglycol                       | <chem>O(CCO)CCO</chem>             | nonsolvent |
| 48  | 1,3-Butanediol                         | <chem>OC(CCO)C</chem>              | nonsolvent |
| 49  | 1,1-Dichloroethane                     | <chem>ClC(Cl)C</chem>              | nonsolvent |
| 50  | Dimethylsulphate                       | <chem>S(OC)(OC)(=O)=O</chem>       | nonsolvent |
| 51  | Ethyl-Chloroformate                    | <chem>ClC(OCC)=O</chem>            | nonsolvent |
| 52  | 2-Nitropropane                         | <chem>O=[N+](([O-])C(C)C</chem>    | nonsolvent |
| 53  | Dichloromethane                        | <chem>ClCCl</chem>                 | nonsolvent |
| 54  | Bromotrichloromethane                  | <chem>BrC(Cl)(Cl)Cl</chem>         | nonsolvent |
| 55  | Furfural                               | <chem>o1cccc1C=O</chem>            | nonsolvent |
| 56  | Heptane                                | <chem>C(CCC)CCC</chem>             | nonsolvent |
| 57  | Aniline                                | <chem>Nc1ccccc1</chem>             | nonsolvent |
| 58  | Acetonitrile                           | <chem>N#CC</chem>                  | nonsolvent |
| 59  | Tert-butylchloride                     | <chem>ClC(C)(C)C</chem>            | nonsolvent |
| 60* | 1,1,3,3-tetramethylguanidine (TMG)     | <chem>CN(C)C(=N)N(C)C</chem>       | nonsolvent |
| 61* | 1,8-diazabicycloundec-7-ene (DBU)      | <chem>N1=C2N(CCCCC2)CCC1</chem>    | solvent    |
| 62* | 1,5-diazabicyclo(4.3.0)non-5-ene (DBN) | <chem>N\2=C1\N(CCC1)CCC/2</chem>   | nonsolvent |
